# Supplementary material for: Efficacy of Flavonoids on Animal Models of Polycystic Ovary Syndrome: A Systematic Review and Meta-Analysis
Source: Nutrients. 2022 Oct 4;14(19):4128. doi: 10.3390/nu14194128 (PMC9571610; doi:10.3390/nu14194128)
Supplement: Supplementary file 1 [file nutrients-14-04128-s001.zip › nutrients-1933156-supplementary.pdf]

## **SUPPLEMENTARY MATERIALS**

## Supplementary Figure 1

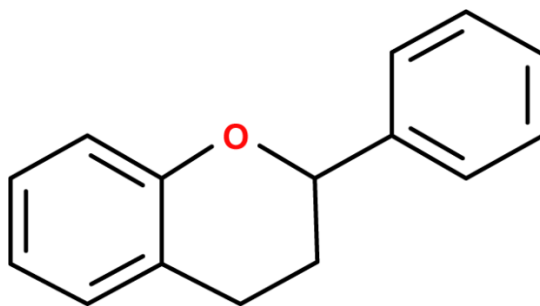

**Figure S1** Basic chemical structure of flavonoids.

## Supplementary Figure 2

|                  | Allocation concealment | Baseline characteristics | Blinding of outcome assessors | Blinding of trial caregivers | Incomplete outcome data | Other sources | Random housing | Random outcome assessment | Selective outcome reporting | Sequence generation |
|------------------|------------------------|--------------------------|-------------------------------|------------------------------|-------------------------|---------------|----------------|---------------------------|-----------------------------|---------------------|
| Bulsara J 2022   | ?                      | +                        | ?                             | ?                            | +                       | ?             | ?              | ?                         | +                           | ?                   |
| Darabi P 2019    | ?                      | +                        | ?                             | ?                            | +                       | -             | ?              | ?                         | +                           | ?                   |
| Hong G 2020      | ?                      | +                        | ?                             | ?                            | +                       | -             | ?              | ?                         | ?                           | ?                   |
| Hu T 2017        | ?                      | +                        | ?                             | ?                            | ?                       | +             | ?              | ?                         | ?                           | ?                   |
| Jahan S 2016     | ?                      | +                        | ?                             | ?                            | +                       | -             | ?              | ?                         | +                           | ?                   |
| Jahan S 2018     | ?                      | +                        | +                             | ?                            | +                       | -             | ?              | ?                         | +                           | +                   |
| Liyanage GS 2021 | ?                      | +                        | +                             | ?                            | +                       | -             | ?              | ?                         | +                           | ?                   |
| Ma XH 2021       | ?                      | +                        | ?                             | ?                            | +                       | ?             | ?              | ?                         | +                           | +                   |
| Mahmoud AA 2022  | ?                      | +                        | ?                             | ?                            | +                       | ?             | ?              | ?                         | +                           | ?                   |
| Manzar N 2020    | ?                      | ?                        | ?                             | ?                            | +                       | -             | ?              | ?                         | +                           | ?                   |
| Mihanfar A 2021  | ?                      | +                        | ?                             | ?                            | +                       | -             | ?              | ?                         | +                           | ?                   |
| Moshfegh F 2022  | ?                      | +                        | ?                             | ?                            | +                       | +             | ?              | ?                         | +                           | +                   |
| Peng FX 2022     | ?                      | +                        | ?                             | ?                            | +                       | -             | ?              | ?                         | +                           | ?                   |
| Rajan RK 2017    | ?                      | +                        | ?                             | ?                            | ?                       | +             | ?              | ?                         | ?                           | ?                   |
| Shah KN 2015     | ?                      | +                        | ?                             | ?                            | +                       | -             | ?              | ?                         | +                           | ?                   |
| Wang W 2019      | ?                      | +                        | ?                             | ?                            | +                       | ?             | ?              | ?                         | +                           | ?                   |
| Yu J 2019        | ?                      | +                        | ?                             | ?                            | +                       | ?             | ?              | ?                         | +                           | ?                   |
| Zheng SY 2021    | ?                      | +                        | ?                             | ?                            | +                       | ?             | ?              | ?                         | +                           | +                   |

**Figure S2** Evaluation of quality for each study.

### Supplementary Figure 3

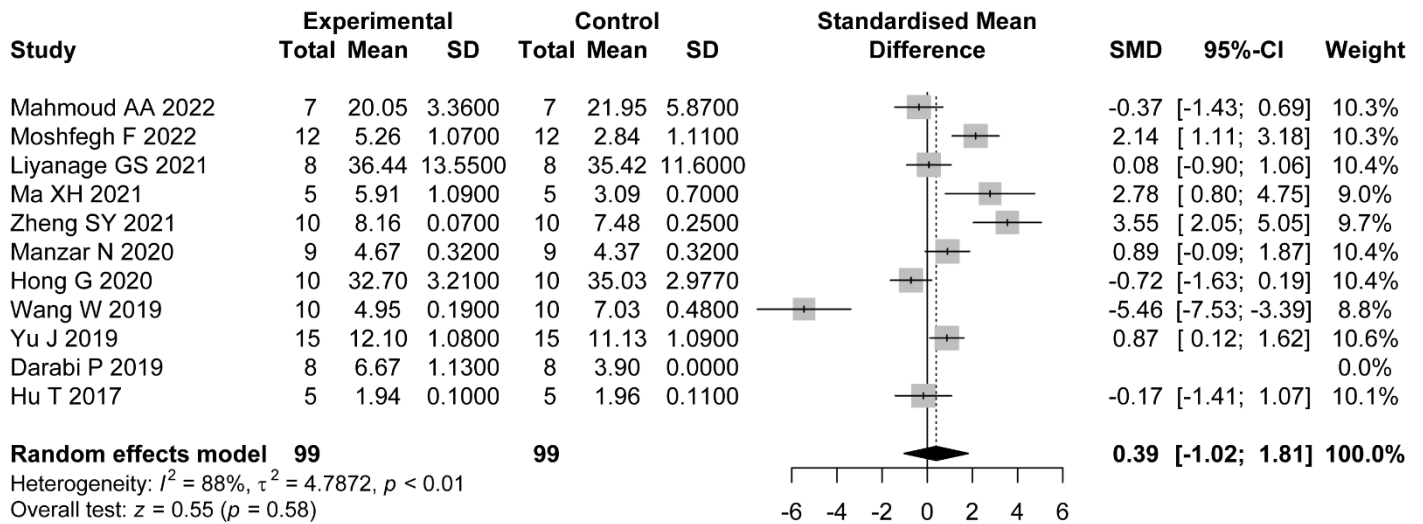

**Figure S3** Forest plot of flavonoids for FSH.

## Supplementary Figure 4

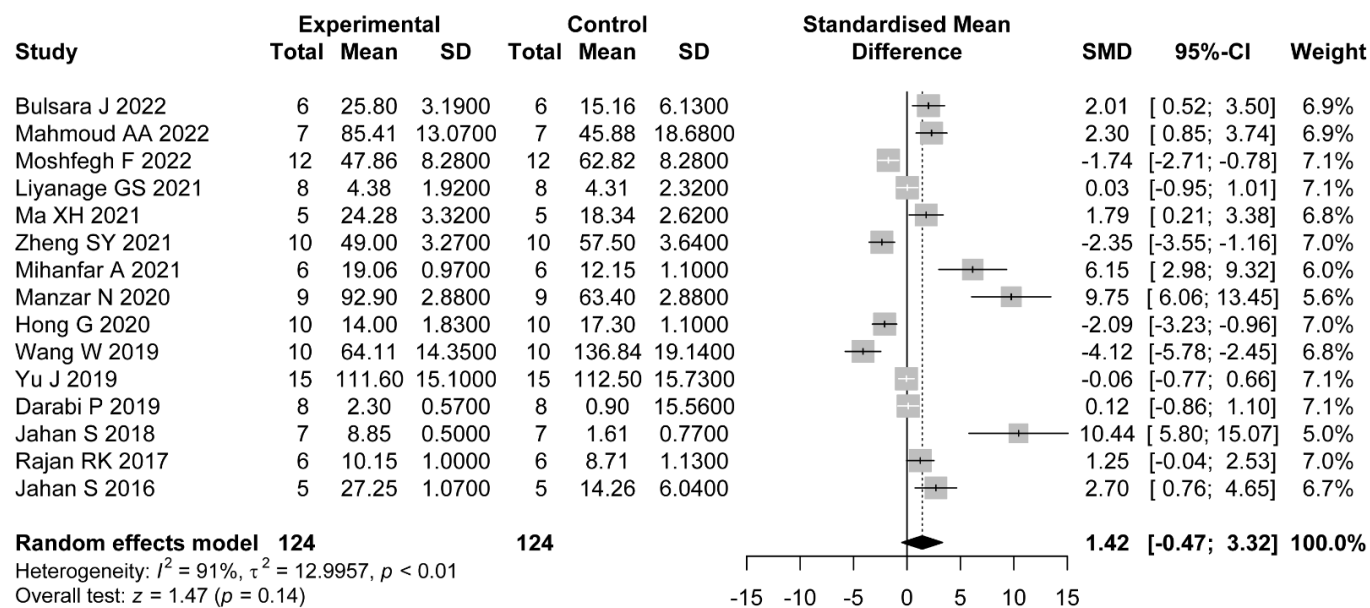

**Figure S4** Forest plot of flavonoids for estradiol.

## Supplementary Figure 5

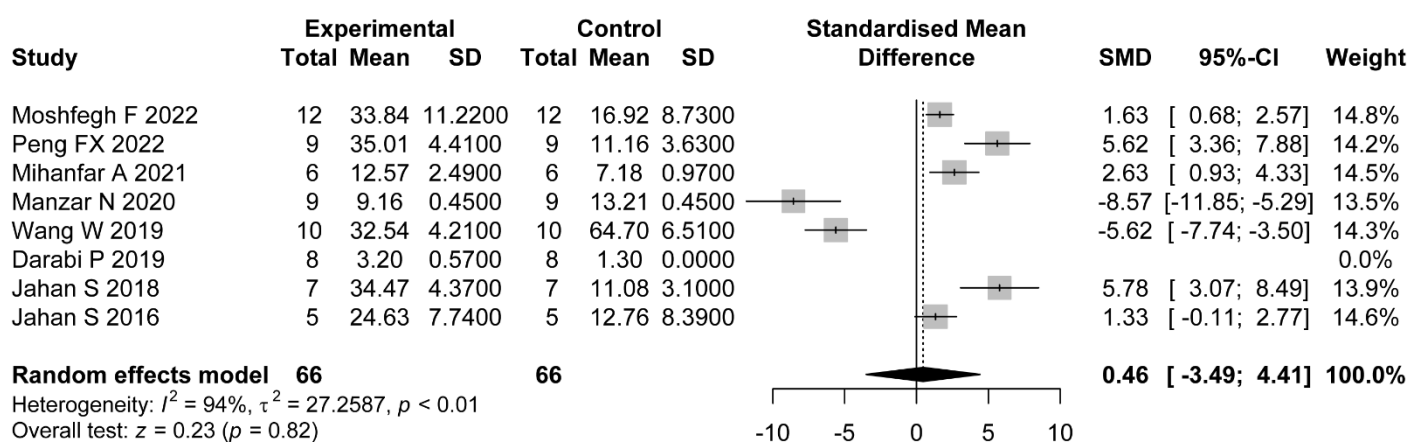

**Figure S5** Forest plot of flavonoids for progesterone.

## Supplementary Figure 6

(A)

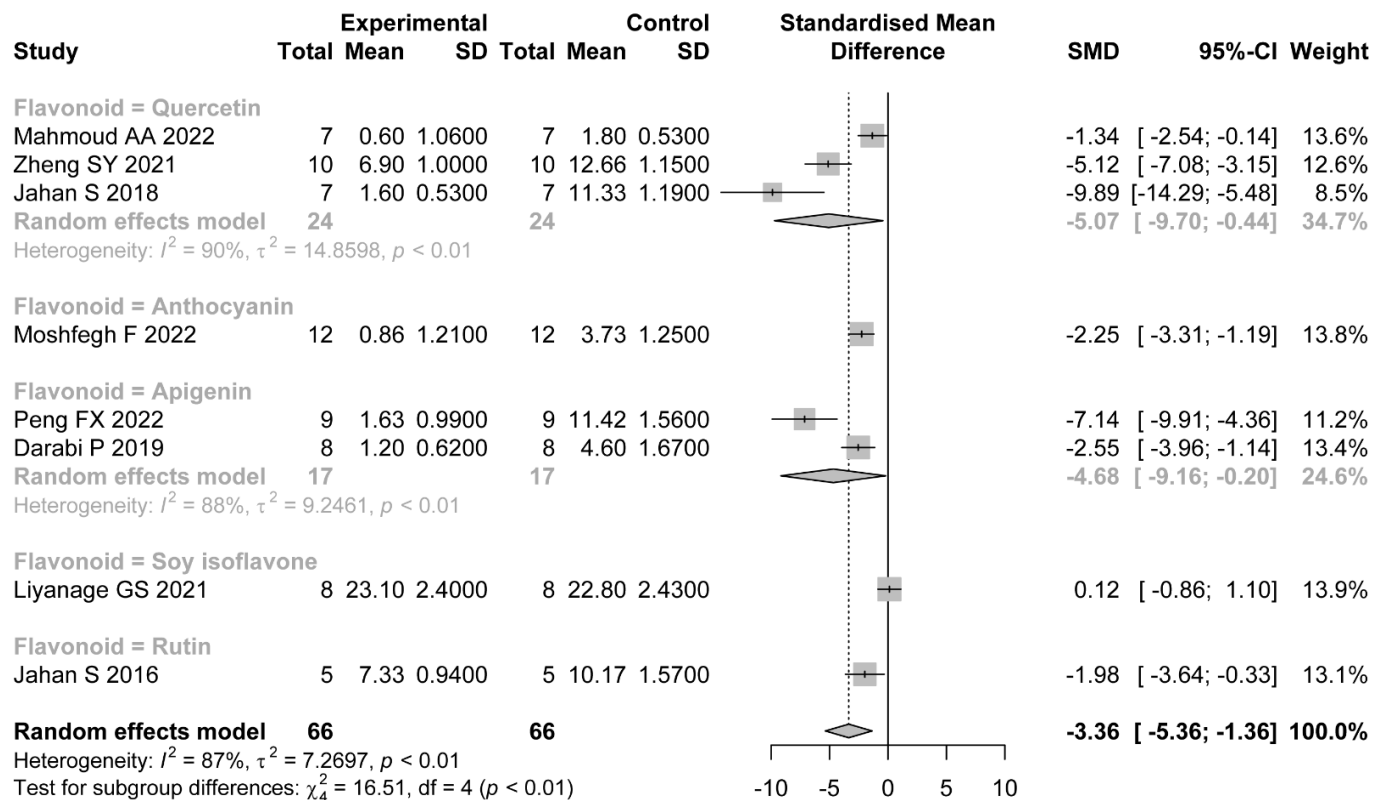

(B)

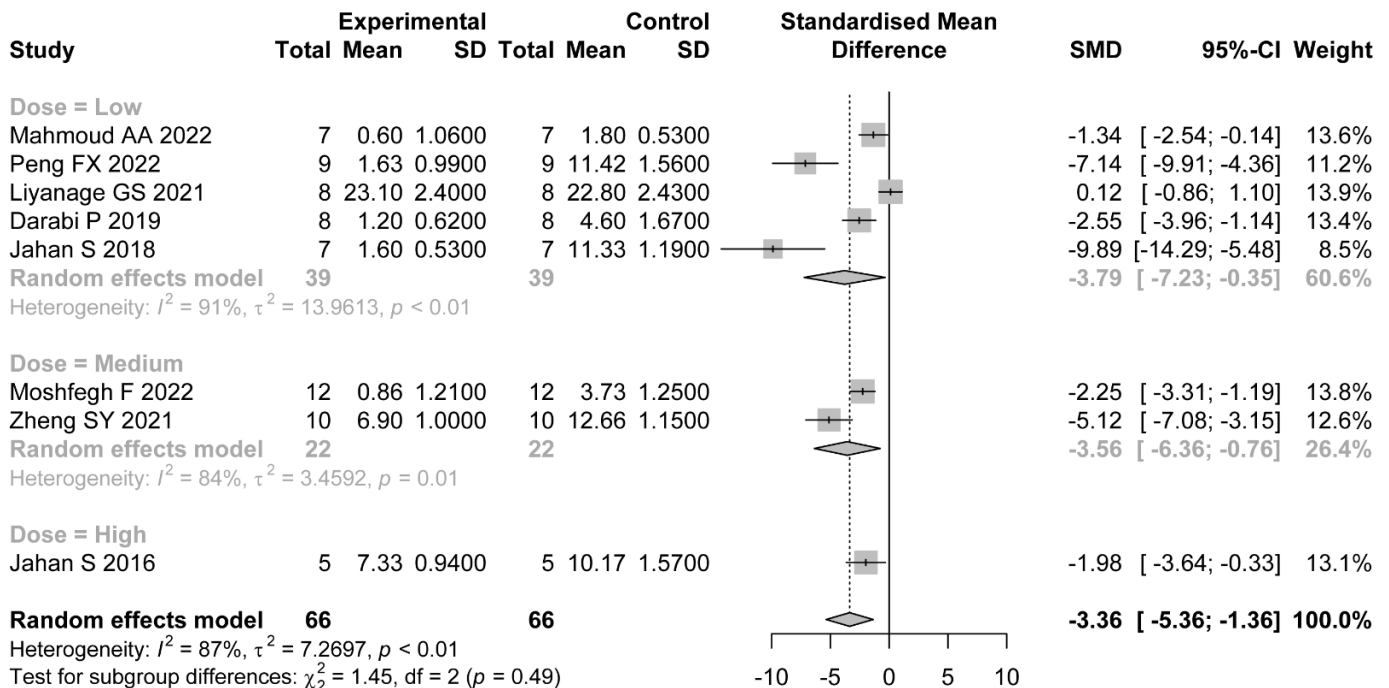

(C)

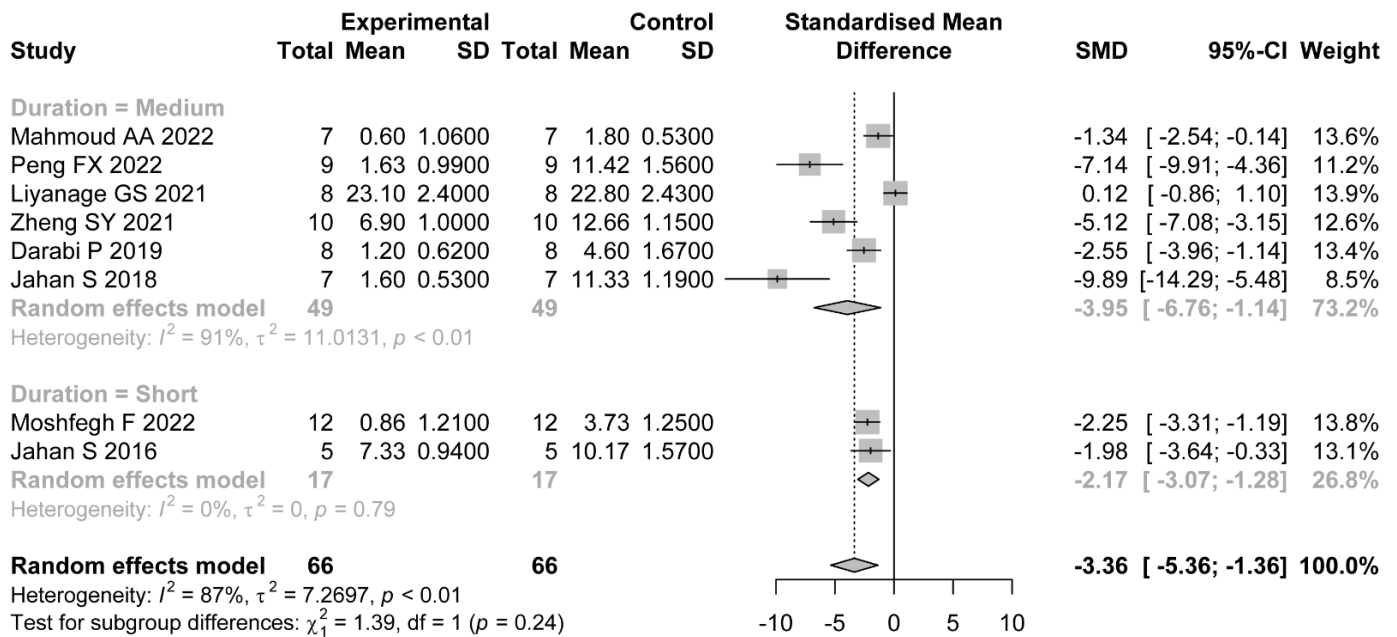

(D)

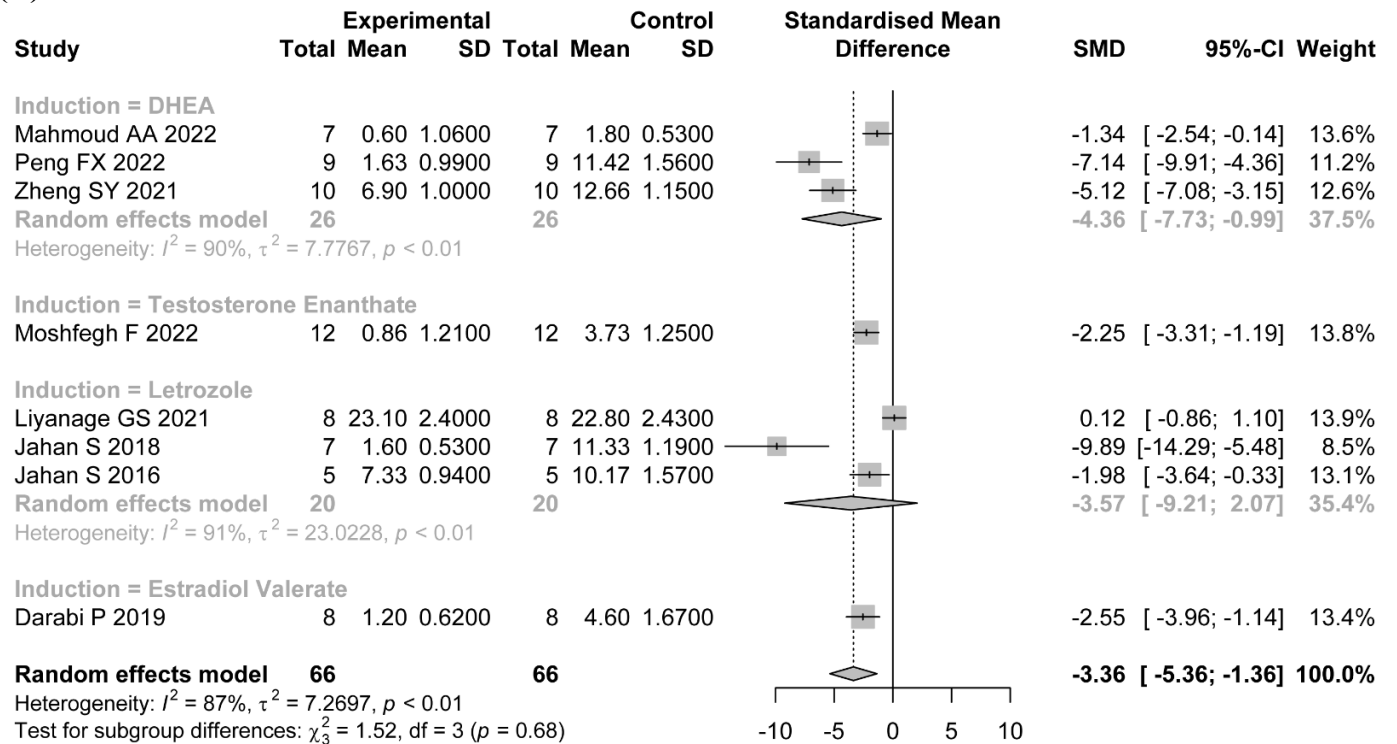

**Figure S6** Subgroup analyses of the count of cystic follicles with (A) type of flavonoids, (B) dose, (C) duration of administration, and (D) PCOS induction drug.

## Supplementary Figure 7

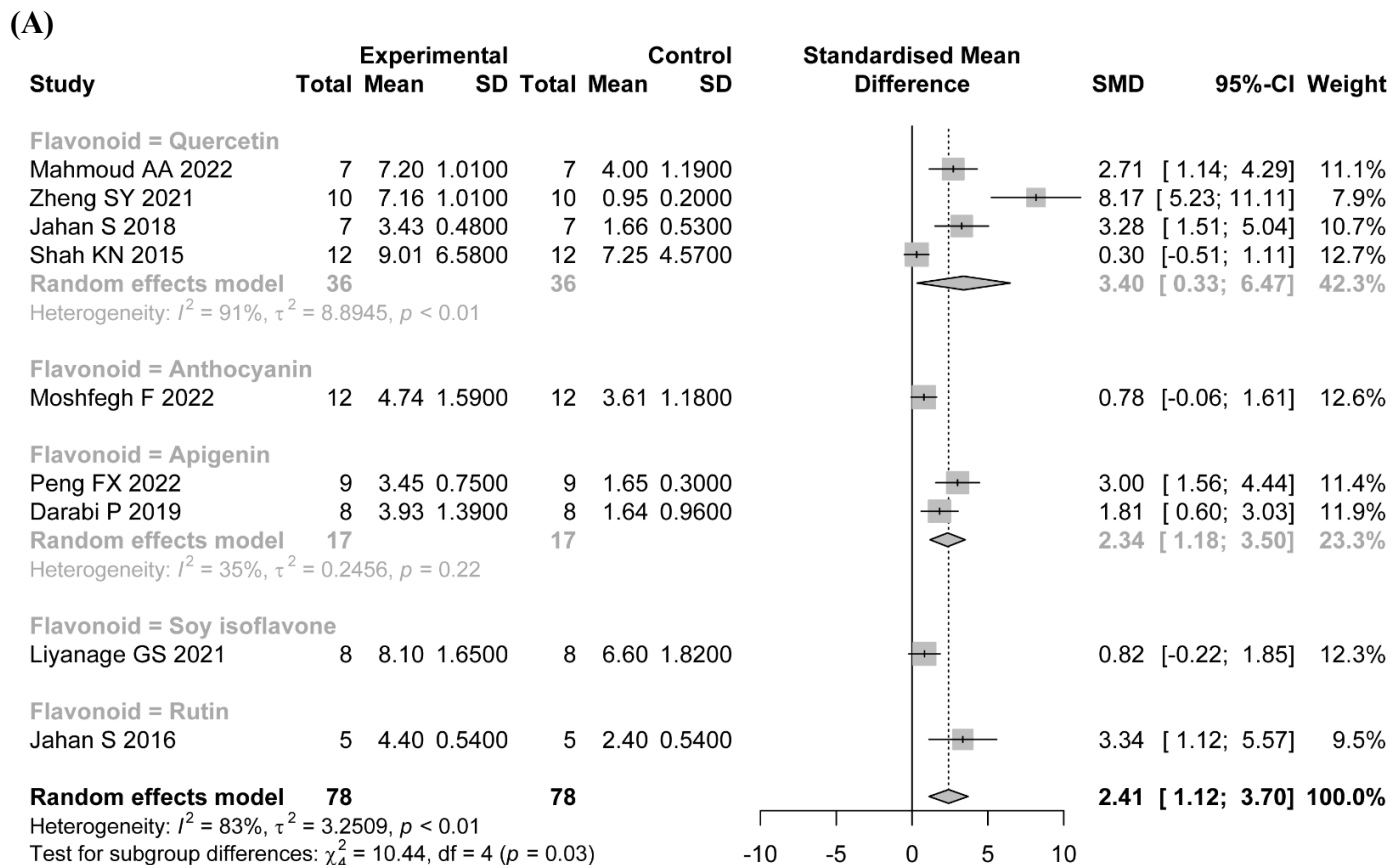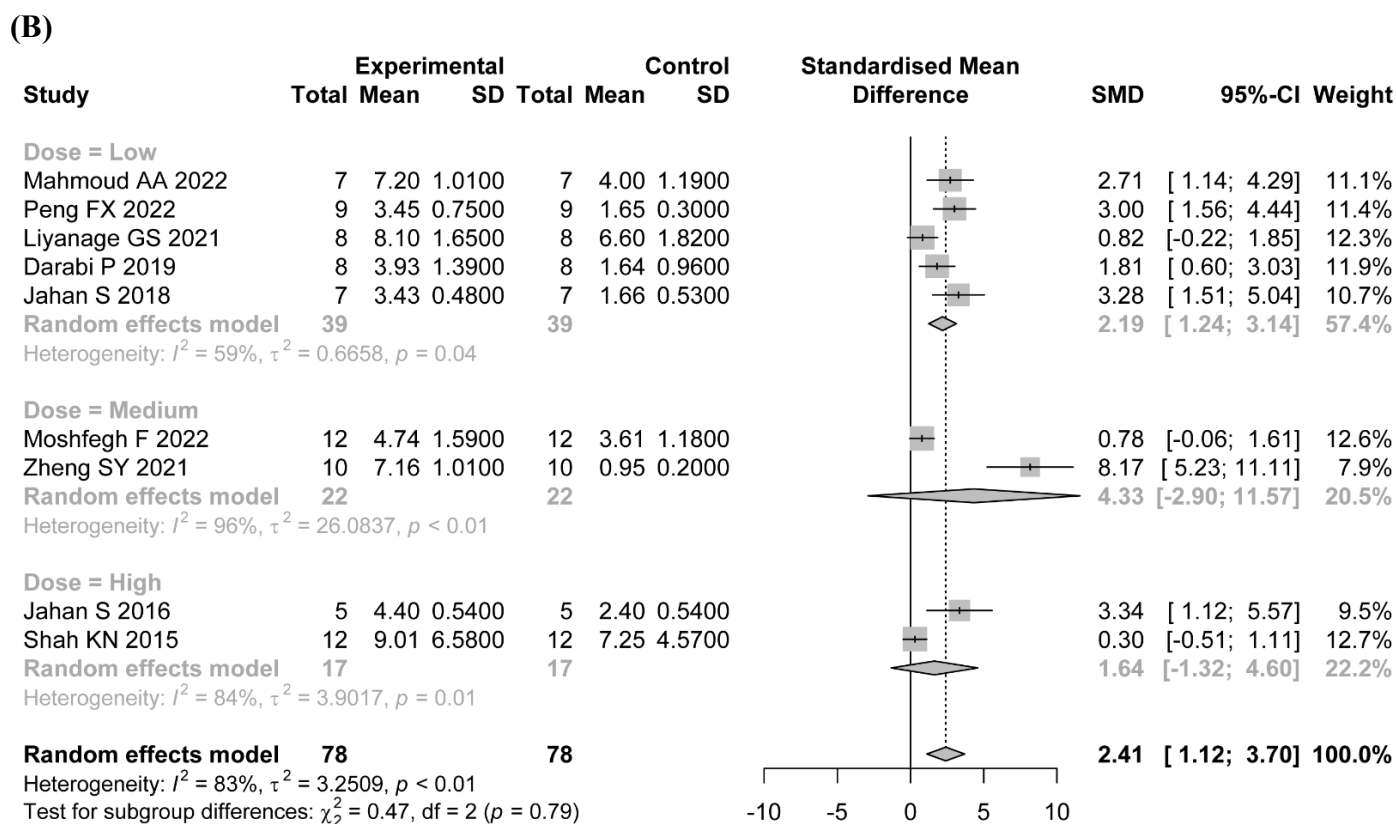

**(C)**

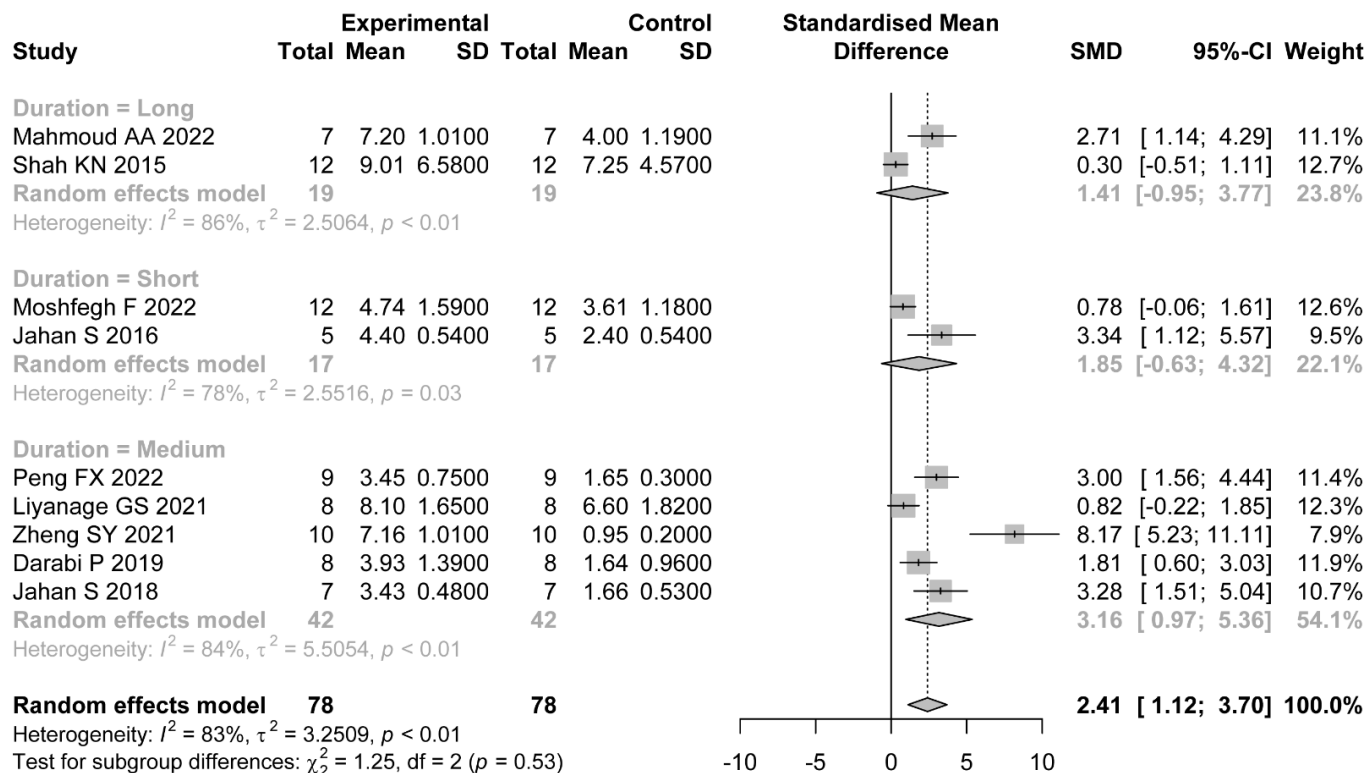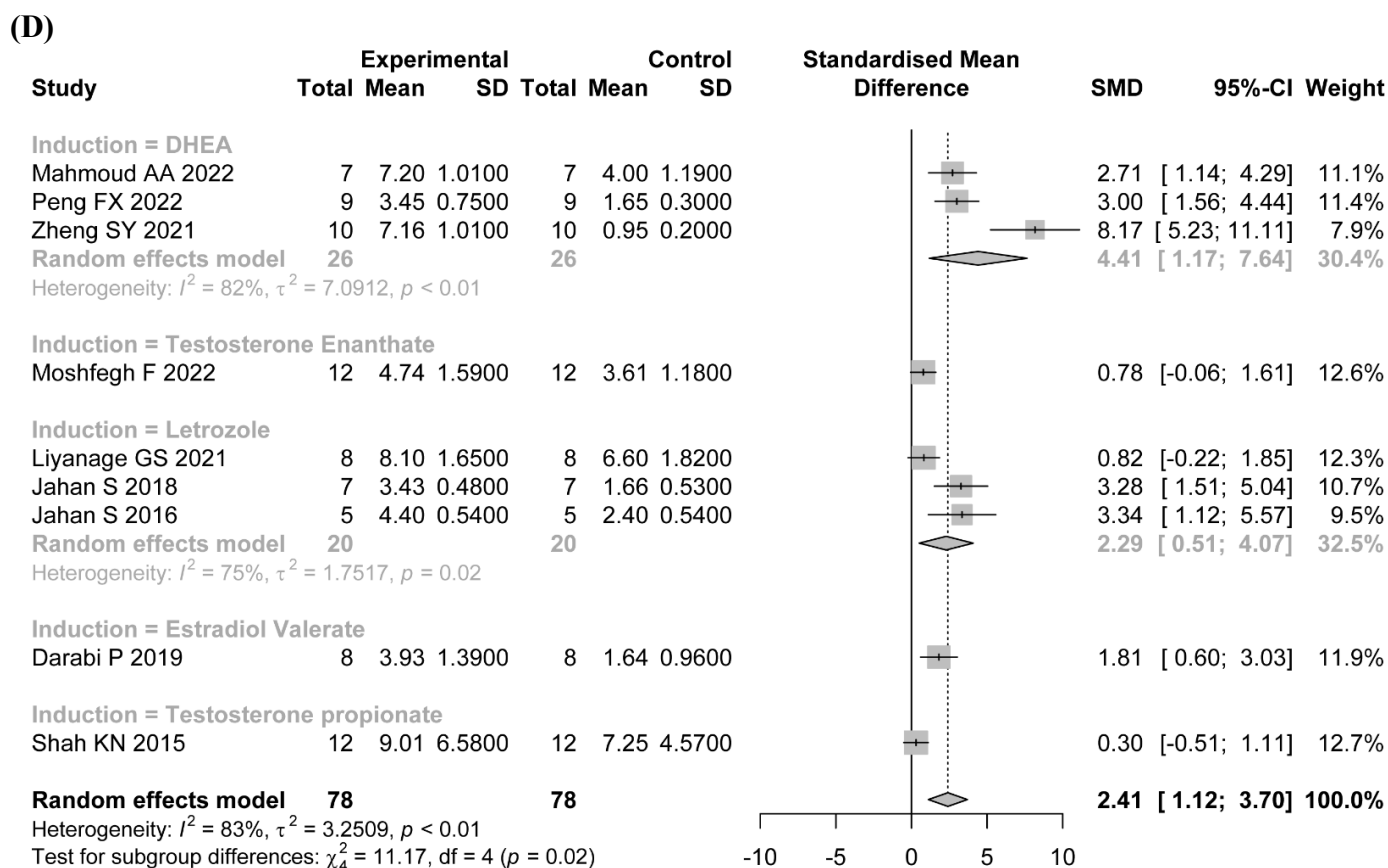

**Figure S7** Subgroup analyses of the count of corpus luteum with (A) type of flavonoids, (B) dose, (C) duration of administration, and (D) PCOS induction drug.

## Supplementary Figure 8

(A)

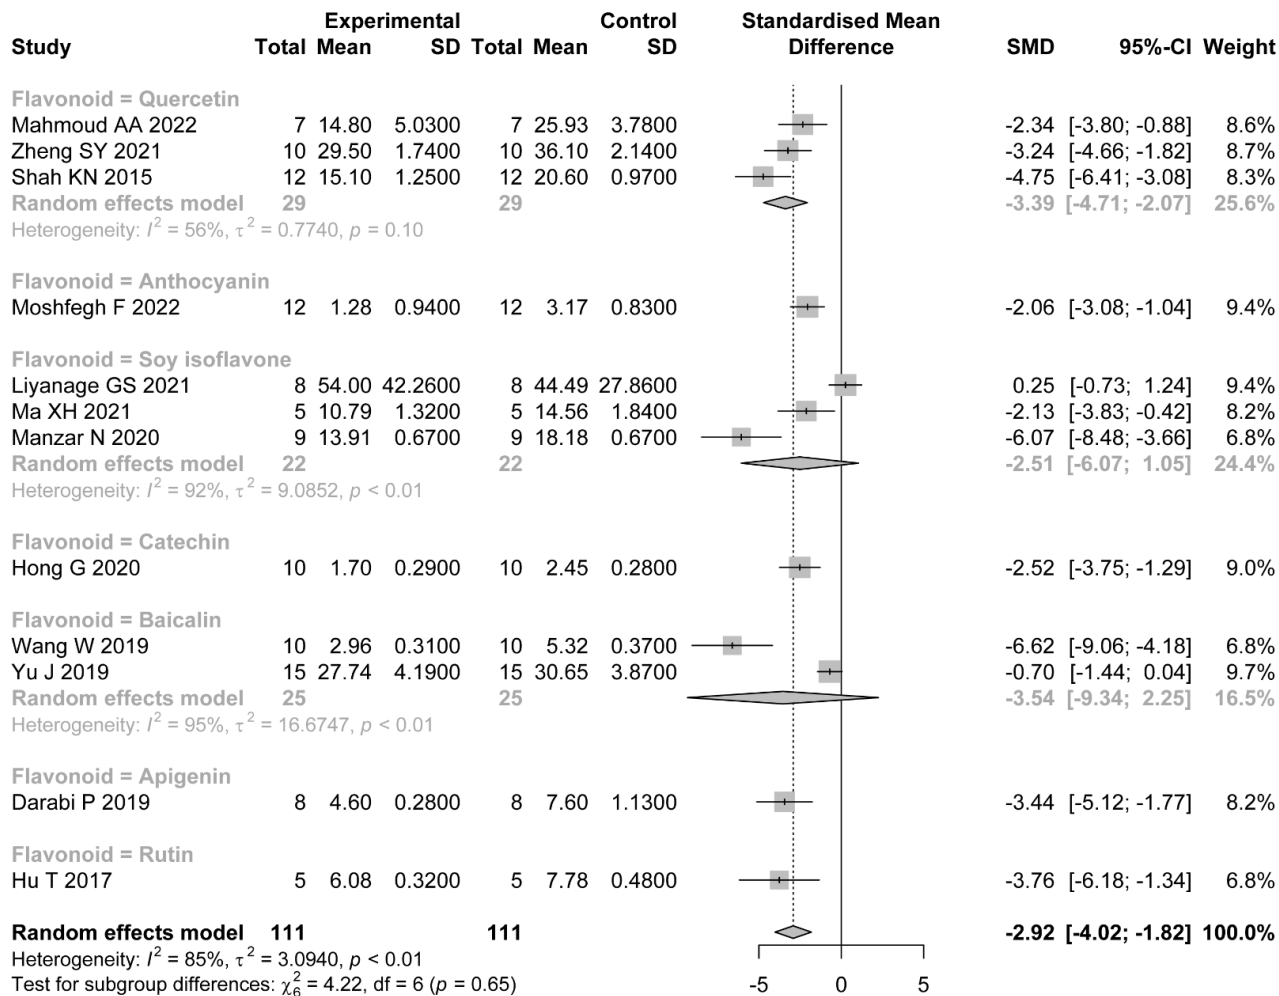

(B)

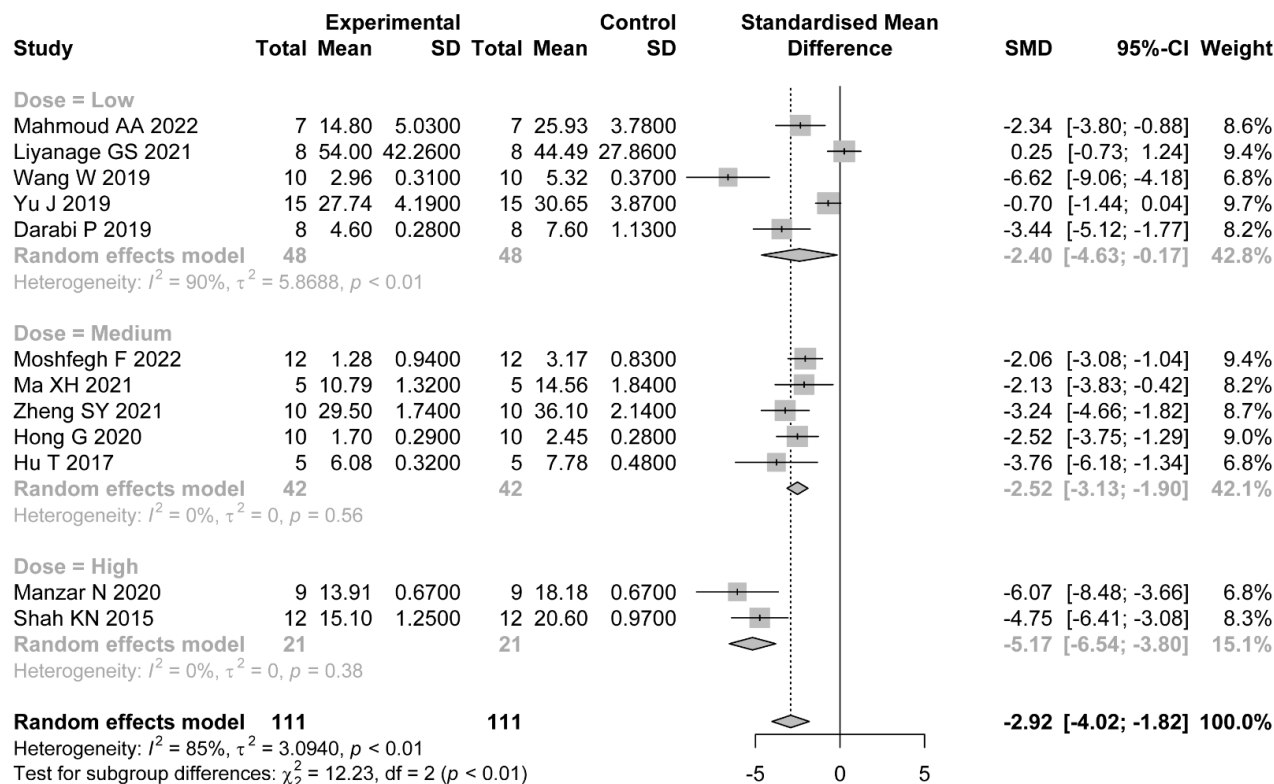

(C)

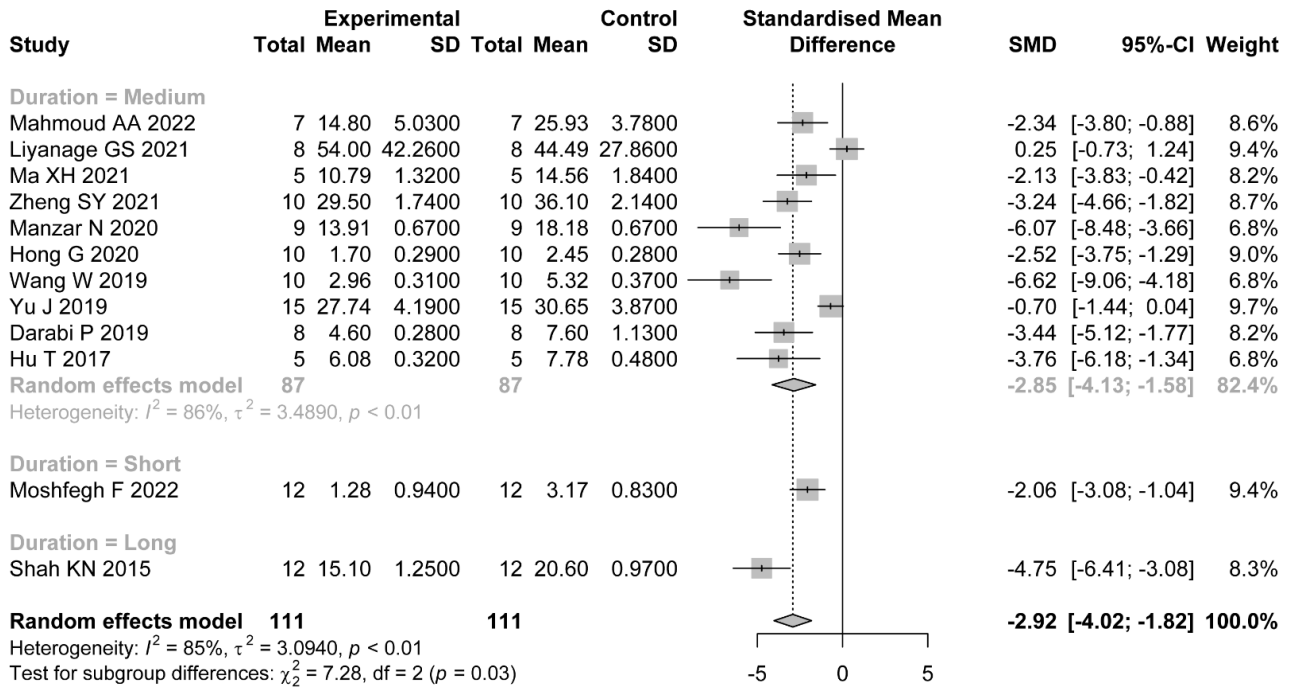

(D)

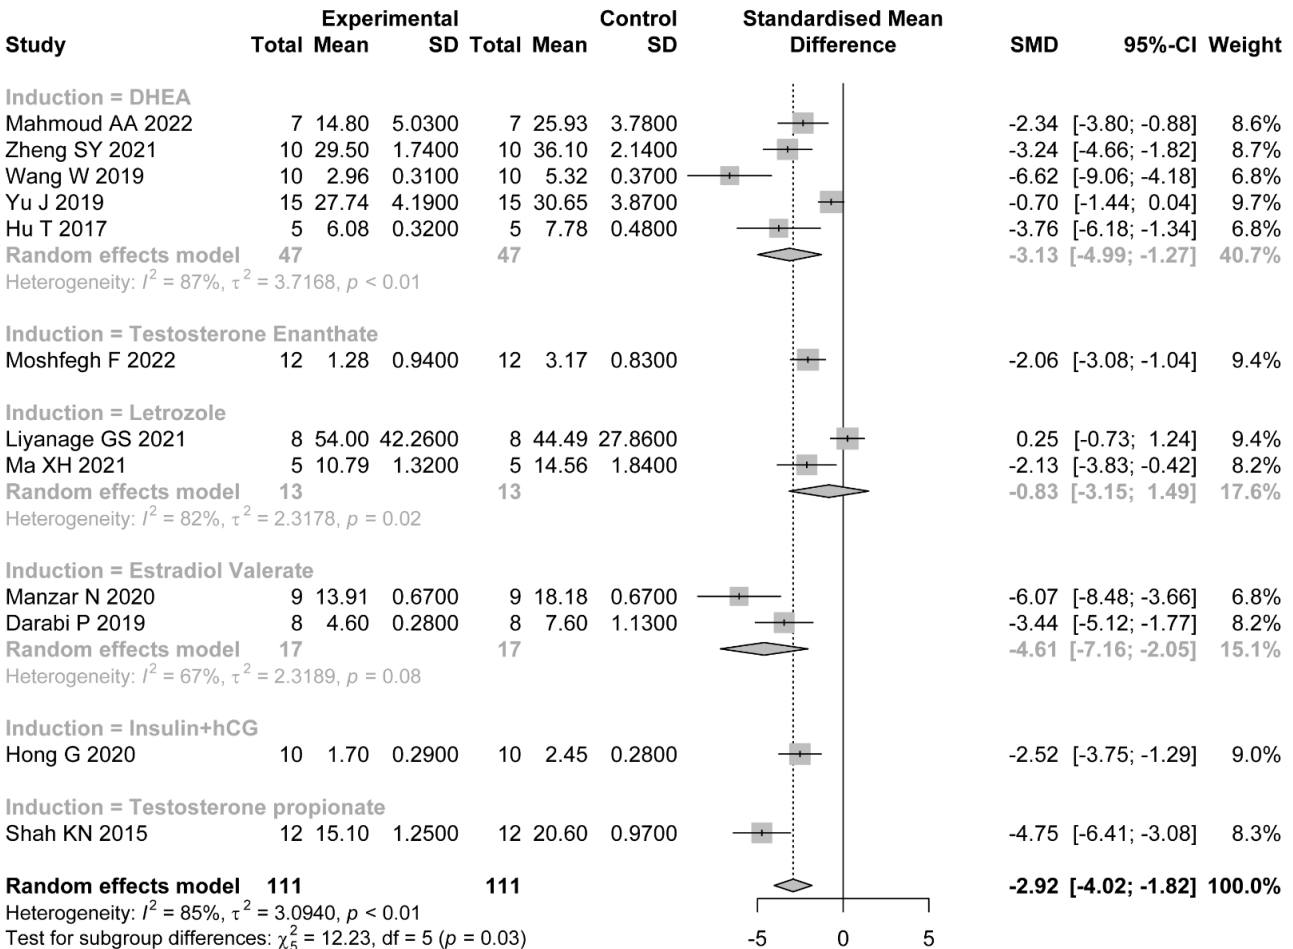

**Supplementary S8** Subgroup analyses of LHwith (A) type of flavonoids, (B) dose, (C) duration of administration, and (D) PCOS induction drug.

## Supplementary Figure 9

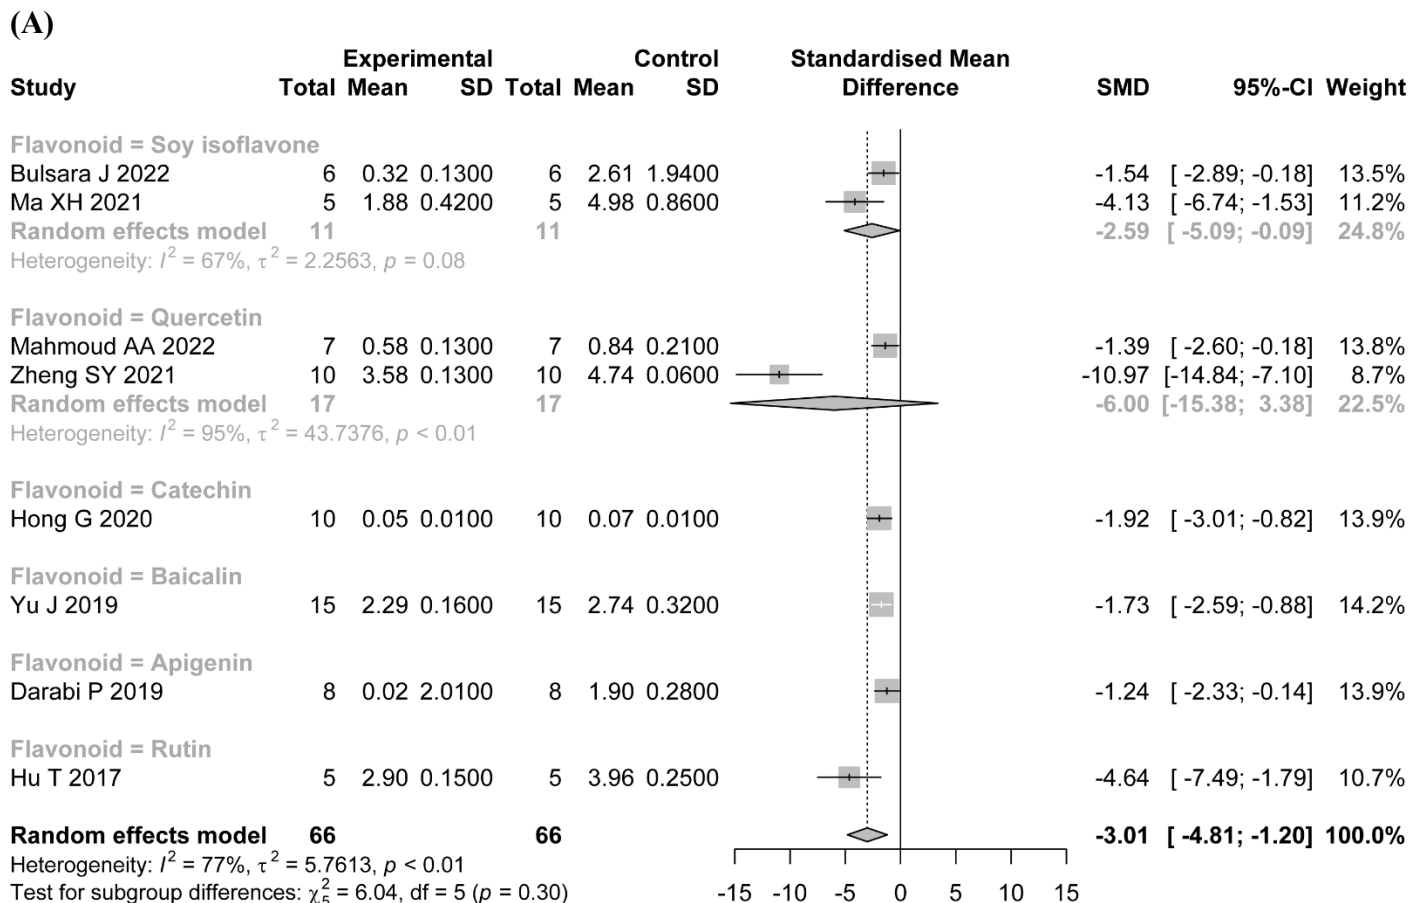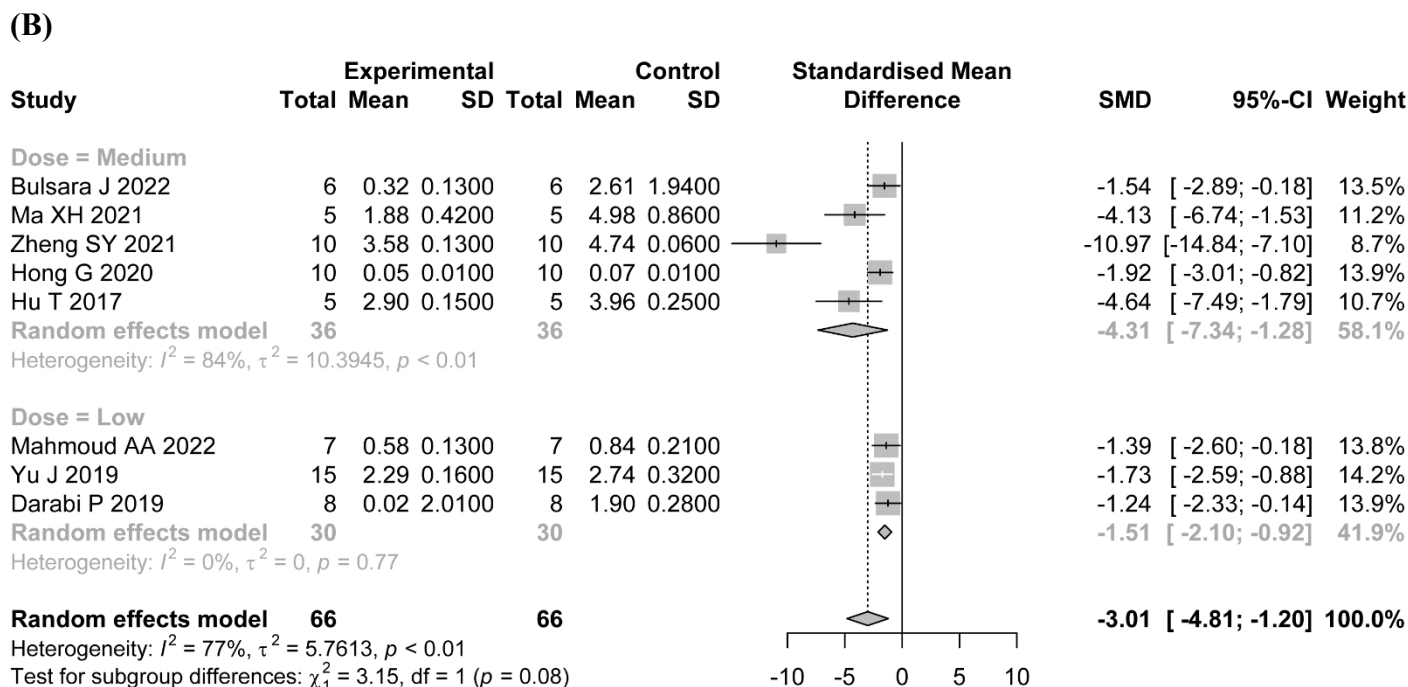

(C)

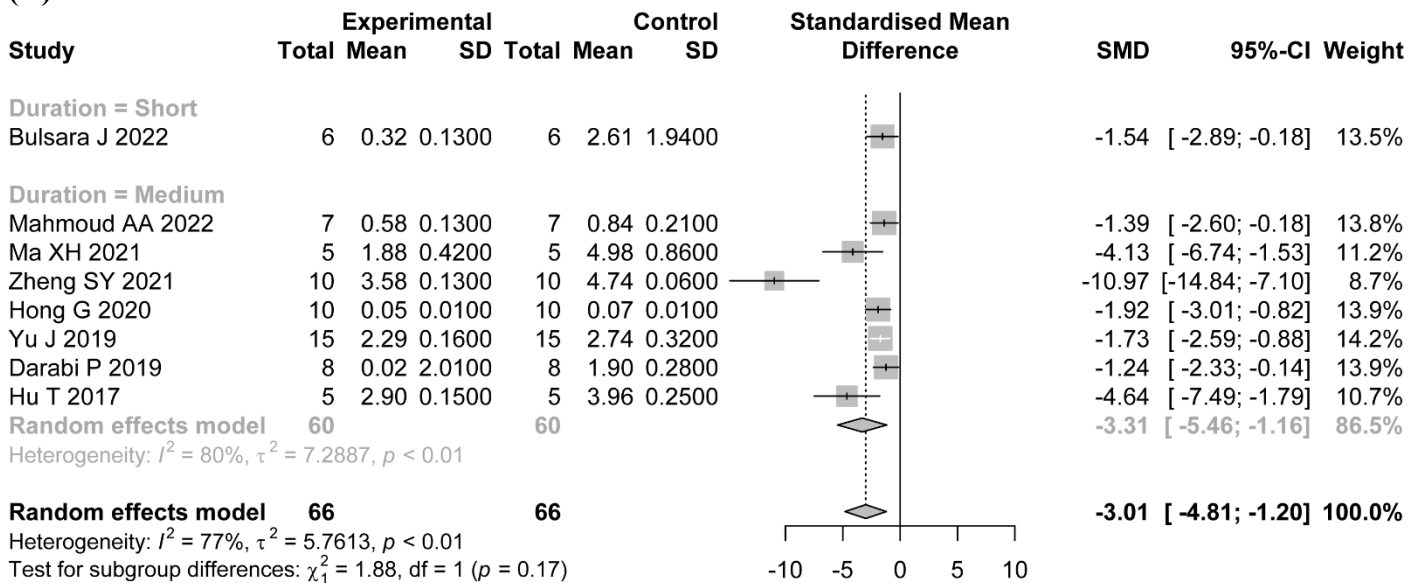

(D)

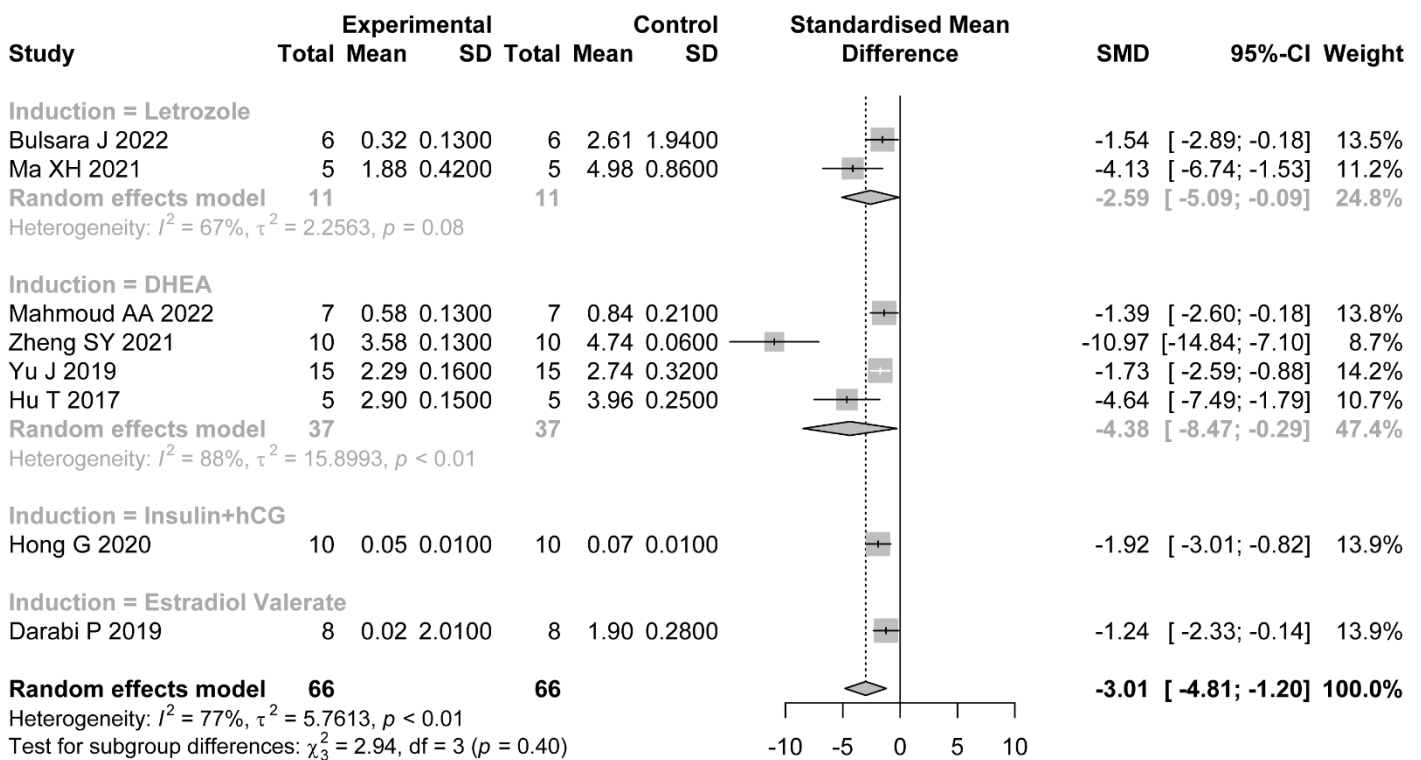

**Figure S9** Subgroup analyses of LH/FSH with (A) type of flavonoids, (B) dose, (C) duration of administration, and (D) PCOS induction drug.

## Supplementary Figure 10

(A)

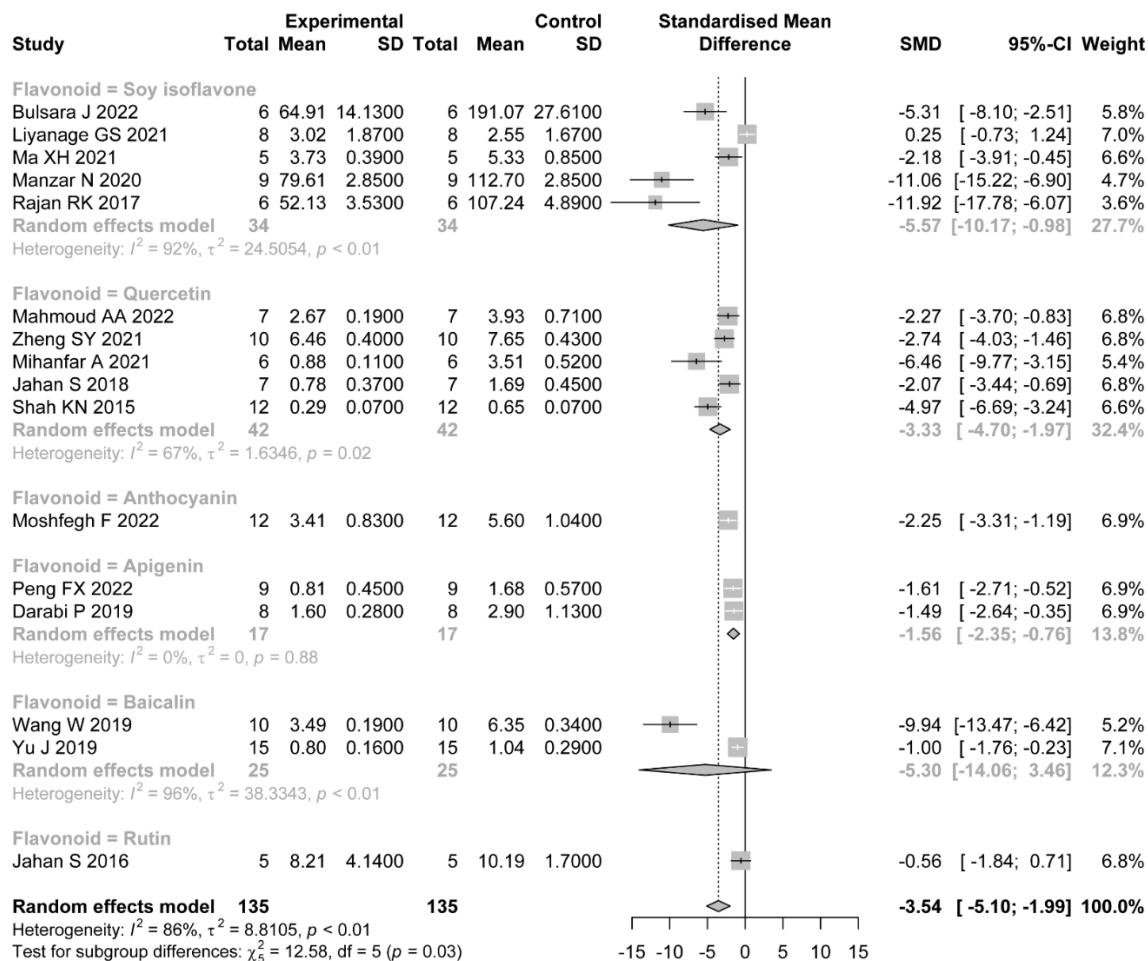

(B)

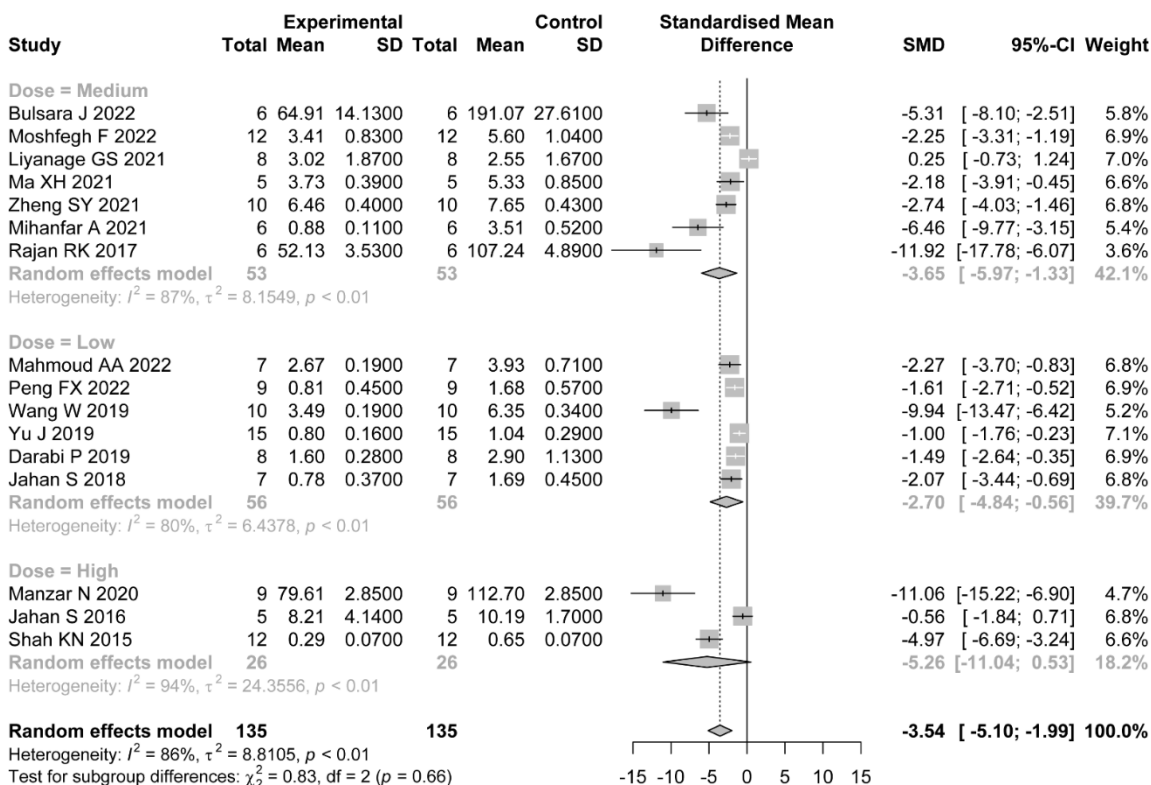

(C)

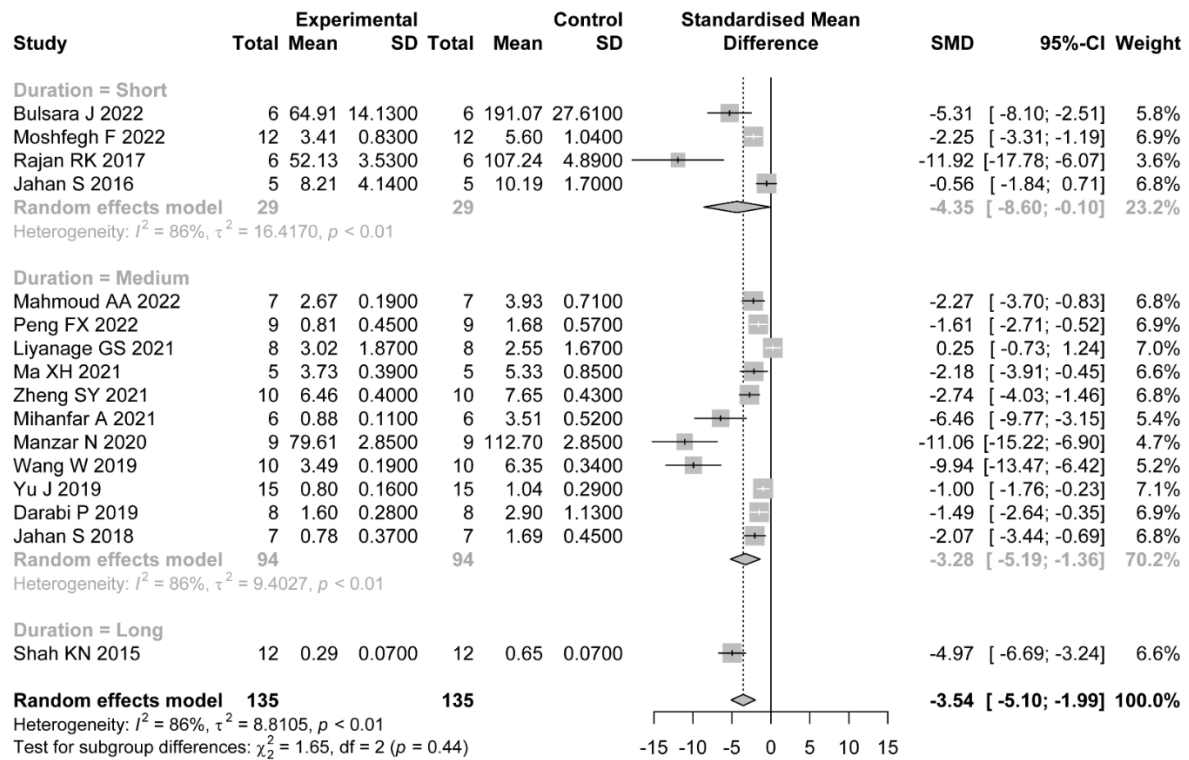

(D)

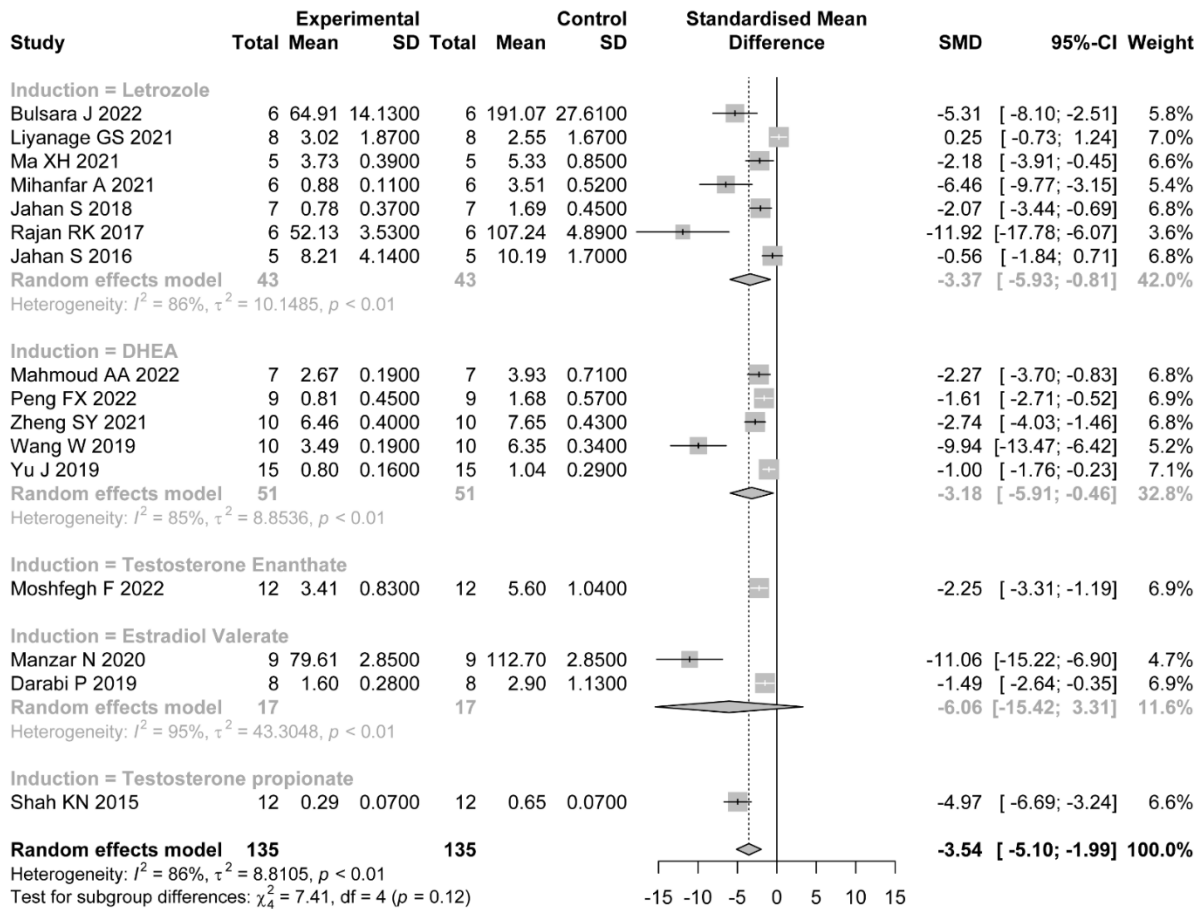

**Figure S10** Subgroup analyses of FT with (A) type of flavonoids, (B) dose, (C) duration of administration, and (D) PCOS induction drug.

## Supplementary Figure 11

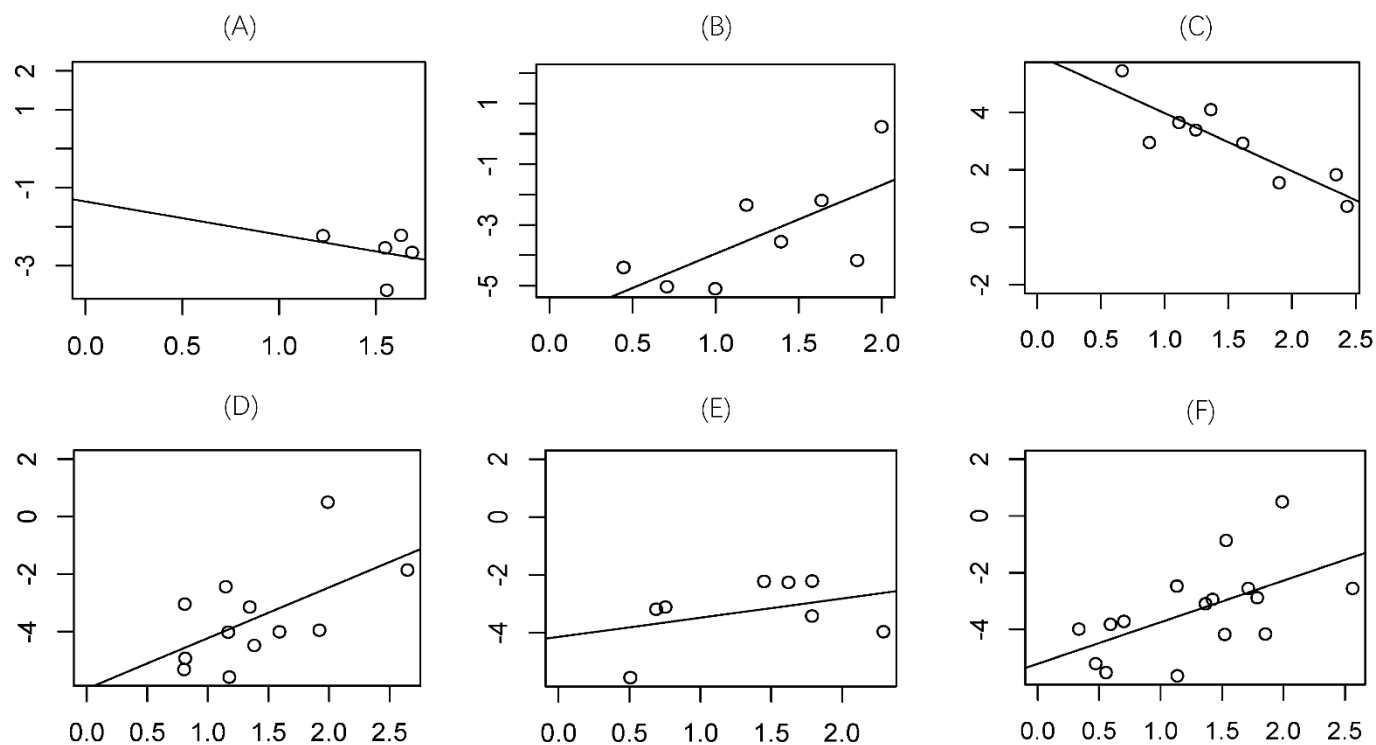

**Figure S11** Egger's bias test of (A) the count of atretic follicles, (B) the count of cystic follicles, (C) the count of corpus luteum, (D) LH, (E) LH/FSH, and (F) FT.

## Supplementary Figure 12

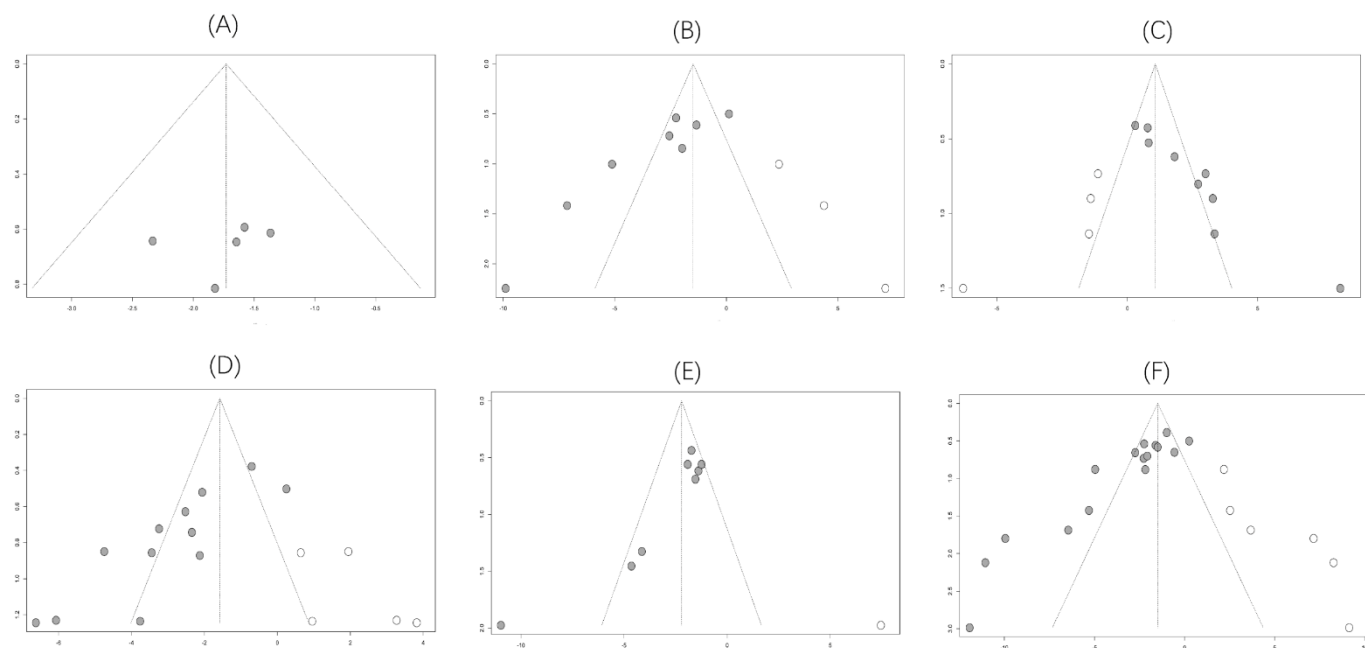

**Figure S12** Trim-and-fill evaluation of (A) the count of atretic follicles, (B) the count of cystic follicles, (C) the count of corpus luteum, (D) LH, (E) LH/FSH, and (F) FT.

## Supplementary Figure 13

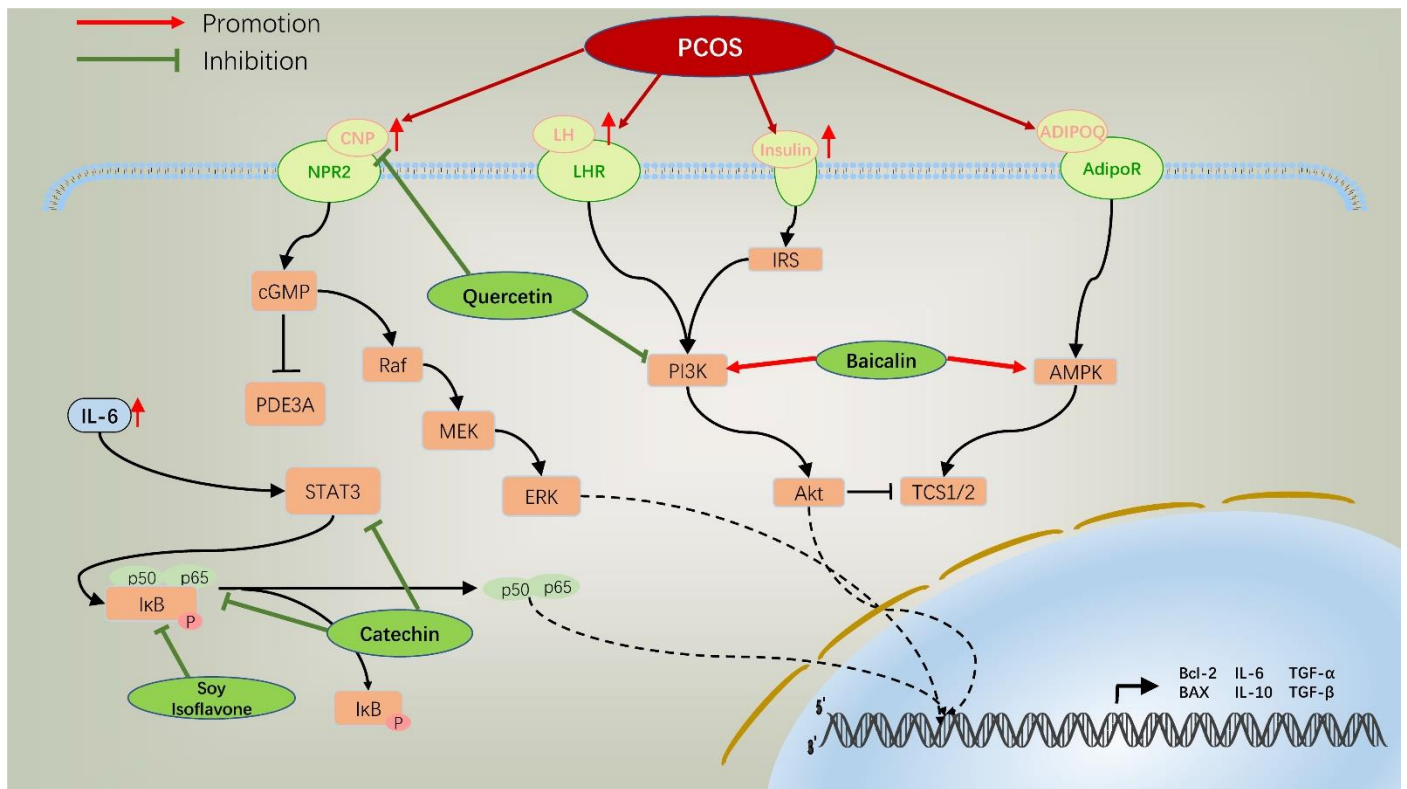

**Figure S13** Possible mechanisms of flavonoids on PCOS animal models.
